# Supplementary material
Source: PubMed Central journal article supplement (PMC6991171)
Supplement: MD-010-C9MD00254E-s001.pdf [file MD-010-C9MD00254E-s001.pdf]

## Supporting information

### **Design of a MUC1-based tricomponent vaccine adjuvanted with FSL-1 for cancer immunotherapy**

Mingjing Li, Zhaoyu Wang, Bocheng Yan, Xiaona Yin, Yue Zhao, Fan Yu, Meng Meng, Yonghui Liu\*, and Wei Zhao\*

## Table of Contents

|                                                                |    |
|----------------------------------------------------------------|----|
| Materials and instruments .....                                | 1  |
| General Procedure for peptides synthesis.....                  | 1  |
| Analytical data for MUC1-(lipo)peptide.....                    | 1  |
| FACS analysis of the antisera binding with B16-MUC1 cells..... | 10 |
| References .....                                               | 10 |

## Materials and instruments

Matrix-assisted laser desorption/ionization time of flight mass spectra (MALDI-TOF MS) were performed using sinapinic acid (SA) or  $\alpha$ -cyano-4-hydroxycinnamic acid (CHCA) as matrix on UltrafleXtreme MALDI-TOF/TOF (Bruker, Germany). Reversed-phase HPLC separations were performed on a Waters system 2487 using solution A (0.1% trifluoroacetic acid in acetonitrile) and solution B (0.1% trifluoroacetic acid in water) for elutions. UV absorption signals were detected with an UV detector at a wavelength of 220nm. Semi-preparative HPLC was used for separation and purification of the peptides on a C-18 column (10  $\mu$ m, 10 $\times$ 250 mm, 100  $\mu$ L per injection) at a flow rate of 2 mL/min. Mouse IgG antibody and Monoclonal Antibody Isotyping kit were purchased from Sigma-Aldrich (USA). ELISA kits detecting IL-6 and IL-12 were purchased from Biolegend (San Diego, CA, USA). MCF-7 and B16-MUC1 cell lines were purchased from China Infrastructure of Cell Line Resources.

## General Procedure for peptides synthesis

(Glycolipo)peptides were synthesized as we previously reported<sup>1</sup>. The solid-phase peptide synthesis (SPPS) for the preparation of vaccine candidate **1** was conducted using 2-chlorotrityl resin preloaded with Fmoc-Alanine (loading: 0.13 mmol g<sup>-1</sup>, 3.85 g, 0.5 mmol). Fmoc amino acids were introduced with 2-(1H-benzotriazole-1-yl)-1,1,3,3-tetramethyluronium hexafluorophosphate (HBTU, 4.0 equiv), 1-hydroxybenzotriazole (HOBT, 4.0 equiv), N,N-diisopropylethylamine (DIPEA, 8.0 equiv). The introduction of glycosylated amino acid was conducted using more reactive 1-[dis(dimethylamino)methylene]-1H-1,2,3-triazolo[4,5-b] pyridinium 3-oxid hexafluorophosphate (HATU, 2.0 equiv), 1-hydroxy-7-azabenzotriazole (HOAt, 2.0equiv), DIPEA (4.0 equiv) and its acetyl moieties were removed by MeONa/MeOH (pH = 10–11). Fmoc-Pam<sub>2</sub>Cys-OH was coupled to the sequence with HATU/HOAt (2.0 equiv) and DIPEA (4.0 equiv). The protecting groups of side chain were removed and the glycopeptide was detached from the resin by adding 90% TFA, 5% TIPS, and 5% H<sub>2</sub>O. The glycolipopeptide was purified by semi-preparative HPLC on a C18 column. Compound **2**, **3**, **4** and **5** were prepared in a similar way. The yield of HPLC is defined as the purification yield.

### Analytical data for MUC1-(lipo)peptide

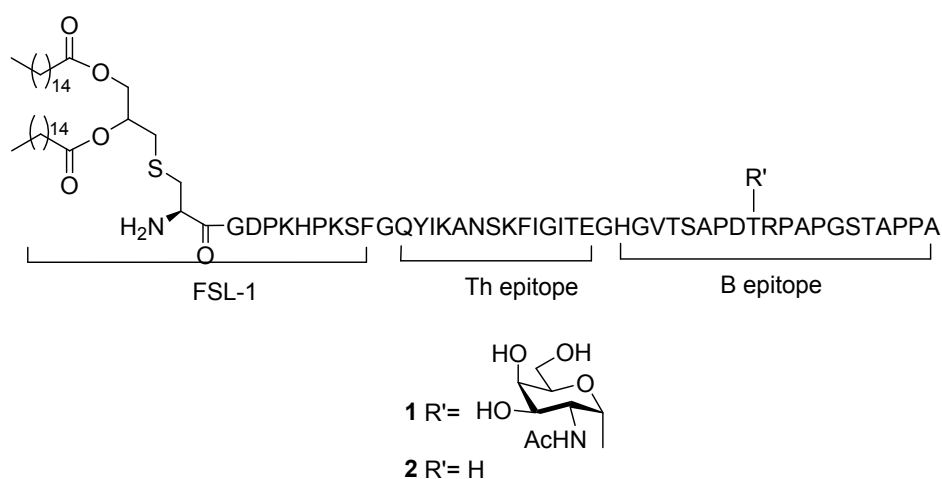

### Compound 1

H-S-[2,3-Bis(palmitoyloxy)-(2RS)-propyl]-(R)-cysteine-Gly-Asp-Pro-Lys-His-Pro-Lys-Ser-Phe-Gly-Gln-Tyr-Ile-Lys-Ala-Asn-Ser-Lys-Phe-Ile-Gly-Ile-Thr-Glu-Gly-His-Gly-Val-Thr-Ser-Ala-Pro-Asp-Thr( $\alpha$ -GalNAc)-Arg-Pro-Ala-Pro-Gly-Ser-Thr-Ala-Pro-Pro-Ala-OH.

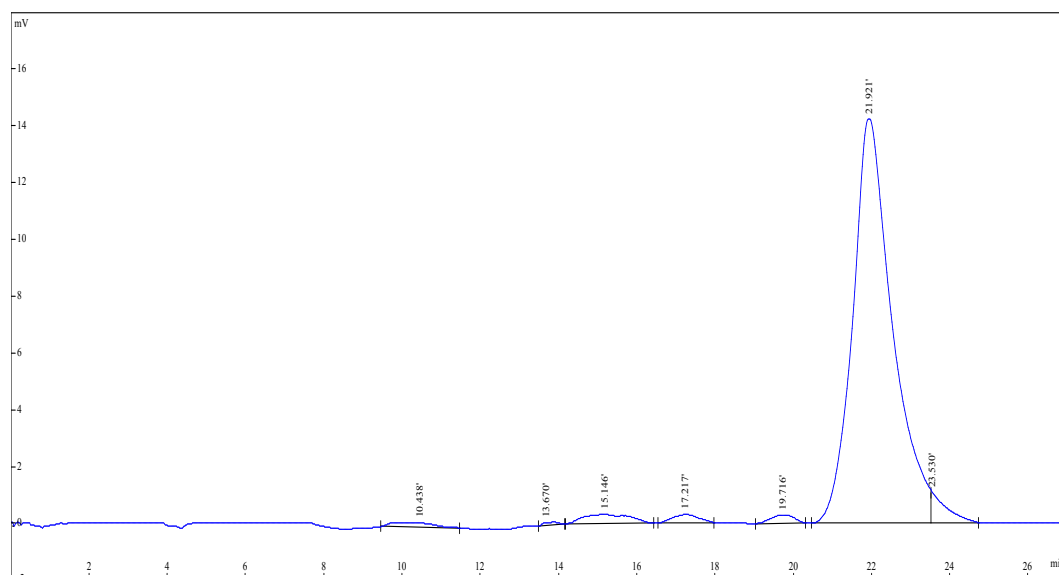

Analytical HPLC: Rt (retention time) = 21.9 min (50-75% of acetonitrile and 0.1% trifluoroacetic acid over 30 min on a C-18 column,  $\lambda=220$  nm). Yield 25% (10.8 mg).

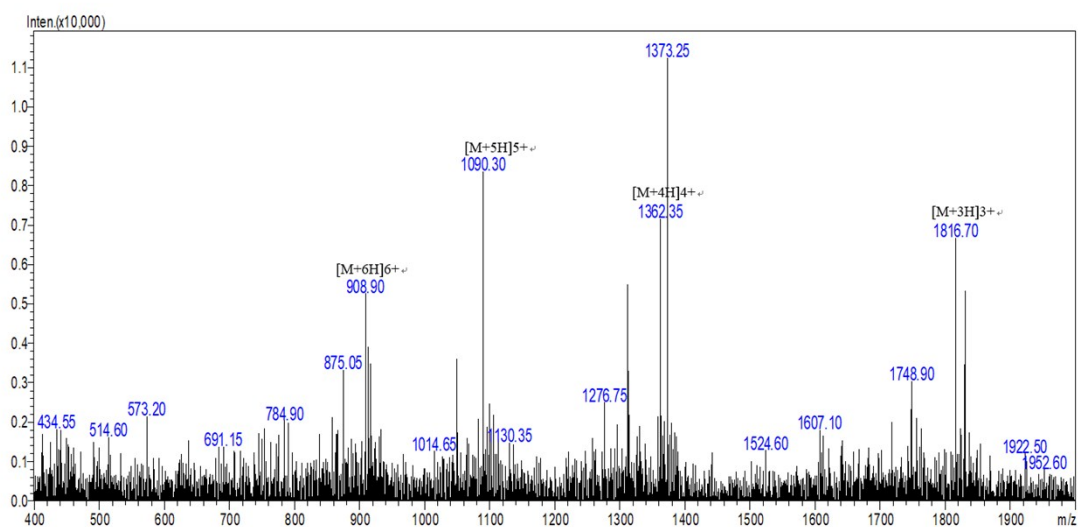

ESI-MS: m/z for  $C_{250}H_{400}N_{60}O_{73}S$   $[M+3H]^3+$  calcd 1815.31, found 1816.70;  $[M+4H]^4+$  calcd 1361.73, found 1362.35;  $[M+5H]^5+$  calcd 1089.59, found 1090.30 ;  $[M+6H]^6+$  calcd 908.16, found 908.90.

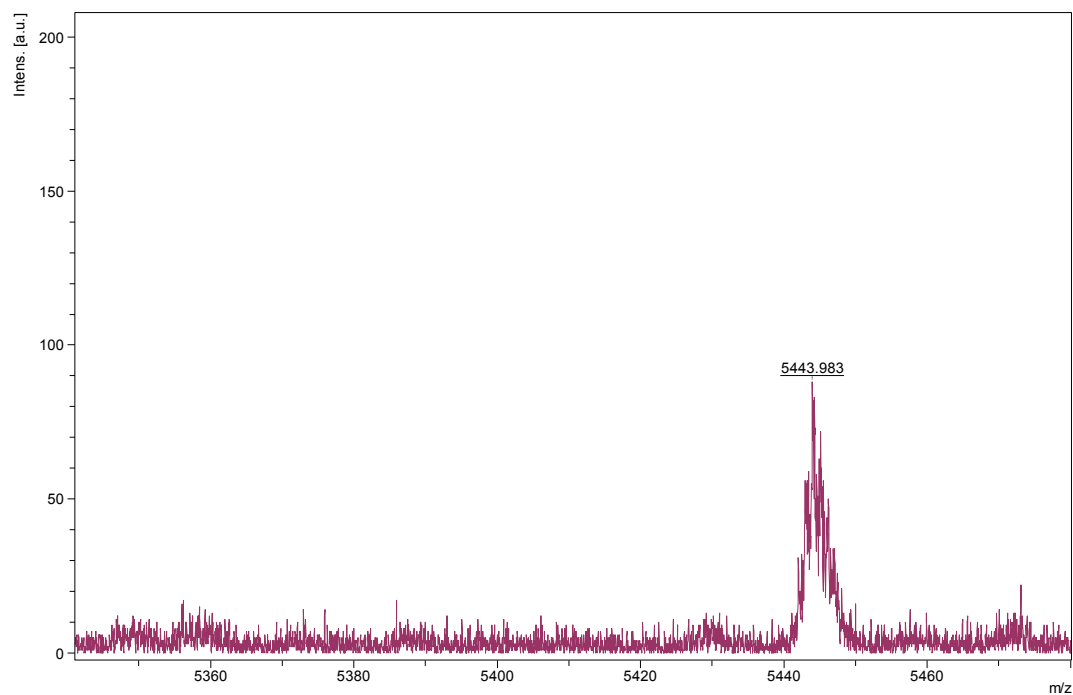

MALDI-TOF-MS :  $C_{250}H_{400}N_{60}O_{73}S$  [M+H]<sup>+</sup> calcd 5443.9226, found 5443.983.

### Compound 2

H-S-[2,3-Bis(palmitoyloxy)-(2RS)-propyl]-(R)-cysteine-Gly-Asp-Pro-Lys-His-Pro-Lys-Ser-Phe-Gly-Gln-Tyr-Ile-Lys-Ala-Asn-Ser-Lys-Phe-Ile-Gly-Ile-Thr-Glu-Gly-His-Gly-Val-Thr-Ser-Ala-Pro-Asp-Thr-Arg-Pro-Ala-Pro-Gly-Ser-Thr-Ala-Pro-Pro-Ala-OH.

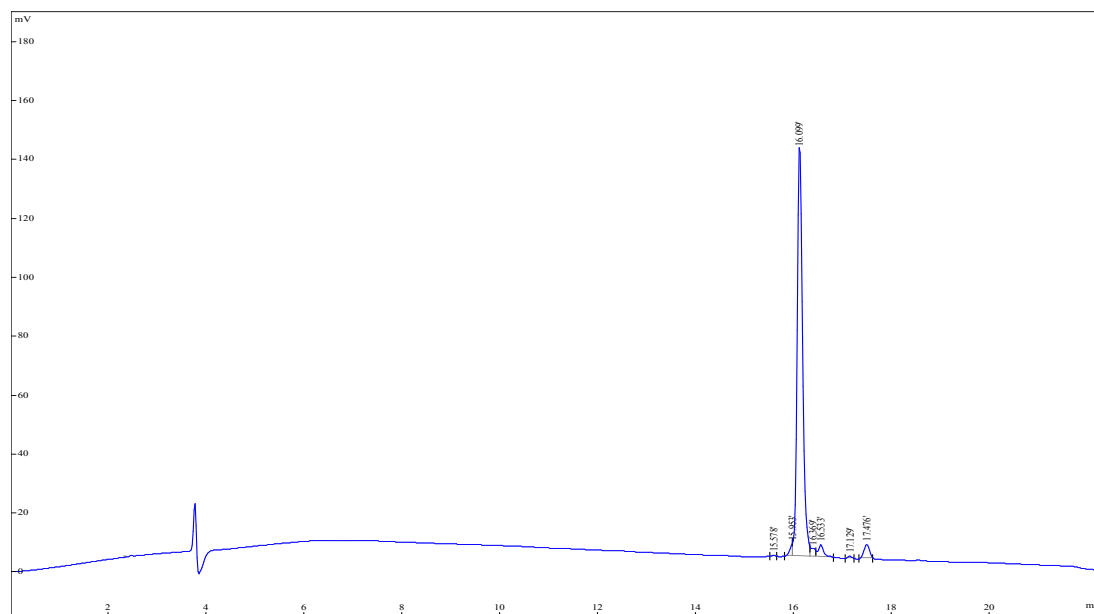

Analytical HPLC: Rt (retention time) = 16.1 min (50-75% of acetonitrile and 0.1% trifluoroacetic acid over 30 min on a C-18 column,  $\lambda=220$  nm). Yield 29% (12.0 mg).

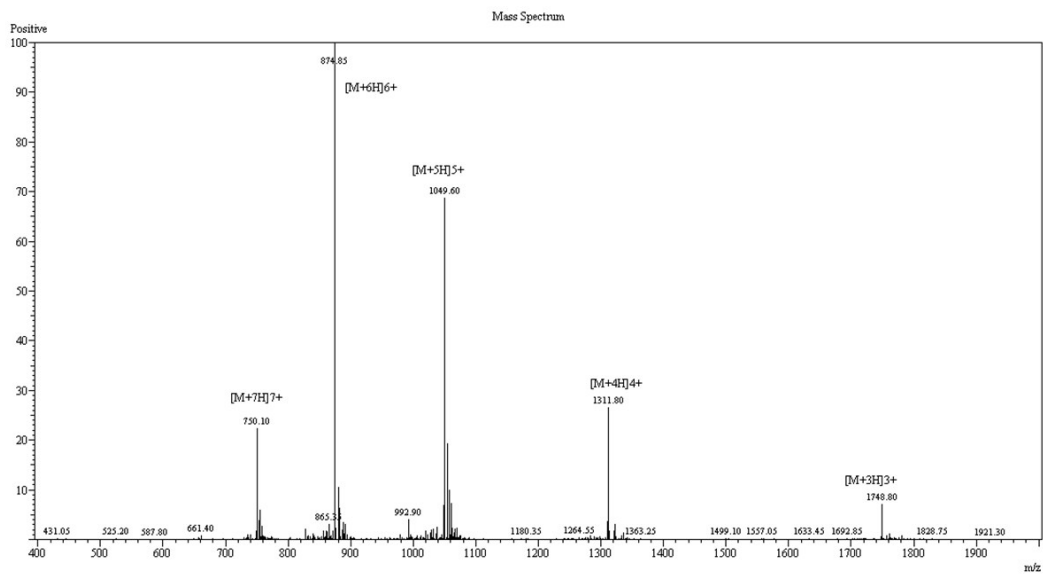

ESI-MS: m/z for  $C_{242}H_{387}N_{59}O_{68}S$   $[M+3H]^{3+}$  calcd 1747.62, found 1748.8;  $[M+4H]^{4+}$  calcd 1310.97, found 1311.80;  $[M+5H]^{5+}$  calcd 1048.97, found 1049.60 ;  $[M+6H]^{6+}$  calcd 874.31, found 874.85;  $[M+7H]^{7+}$  calcd 749.56, found 750.10.

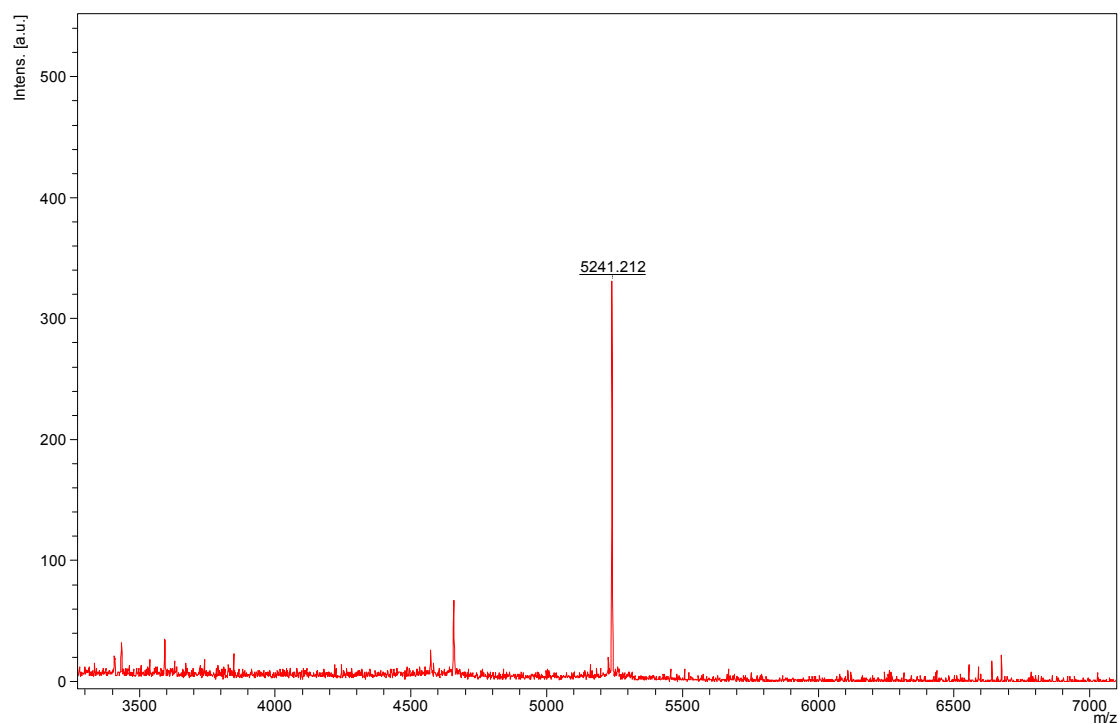

MALDI-TOF-MS :  $C_{242}H_{387}N_{59}O_{68}S$   $[M+H]^+$  calcd 5240.8432, found 5241.212.

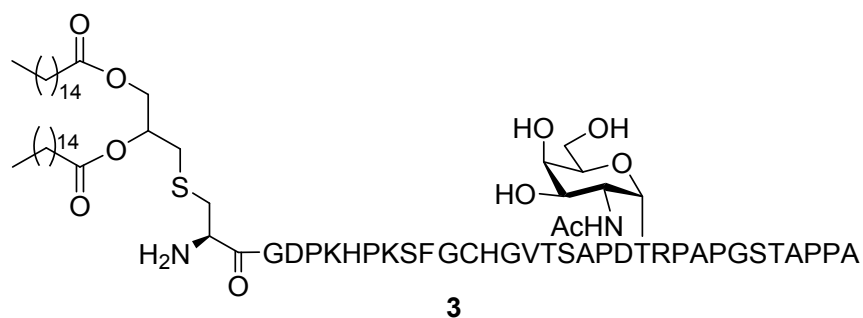

### Compound 3

H-S-[2,3-Bis(palmitoyloxy)-(2RS)-propyl]-(R)-cysteine-Gly-Asp-Pro-Lys-His-Pro-Lys-Ser-Phe-Gly-Cys-His-Gly-Val-Thr-Ser-Ala-Pro-Asp-Thr-Arg-Pro-Ala-Pro-Gly-Ser-Thr-Ala-Pro-Pro-Ala-OH.

The compound was characterized in our previous report<sup>1</sup>.

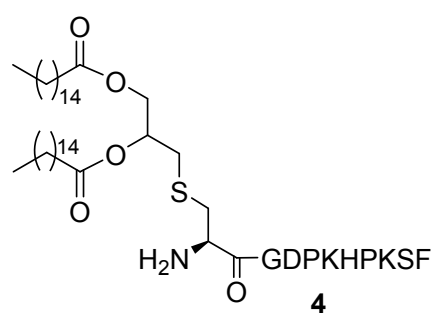

### Compound 4

H-S-[2,3-Bis(palmitoyloxy)-(2RS)-propyl]-(R)-cysteine-Gly-Asp-Pro-Lys-His-Pro-Lys-Ser-Phe

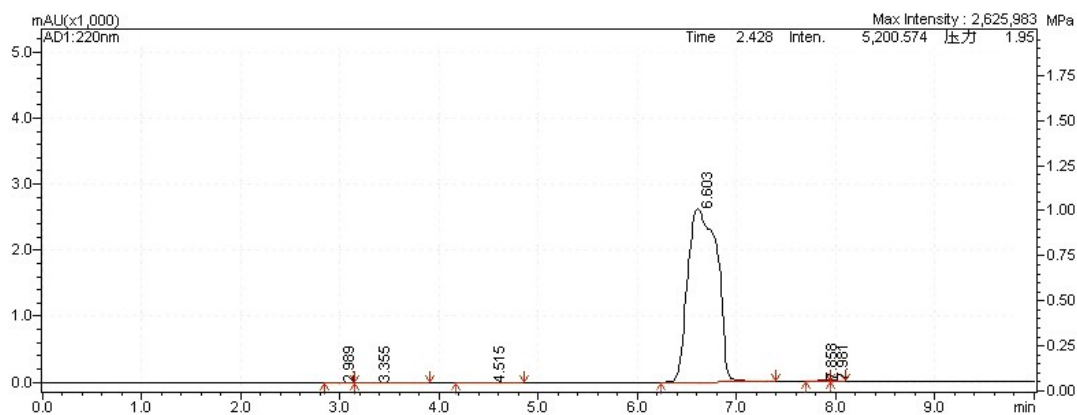

Analytical HPLC: Rt (retention time) = 6.603 min (10-100% of acetonitrile and 0.1% trifluoroacetic acid over 10 min on a C-18 column,  $\lambda=220$  nm). Yield 49% (9.6 mg).

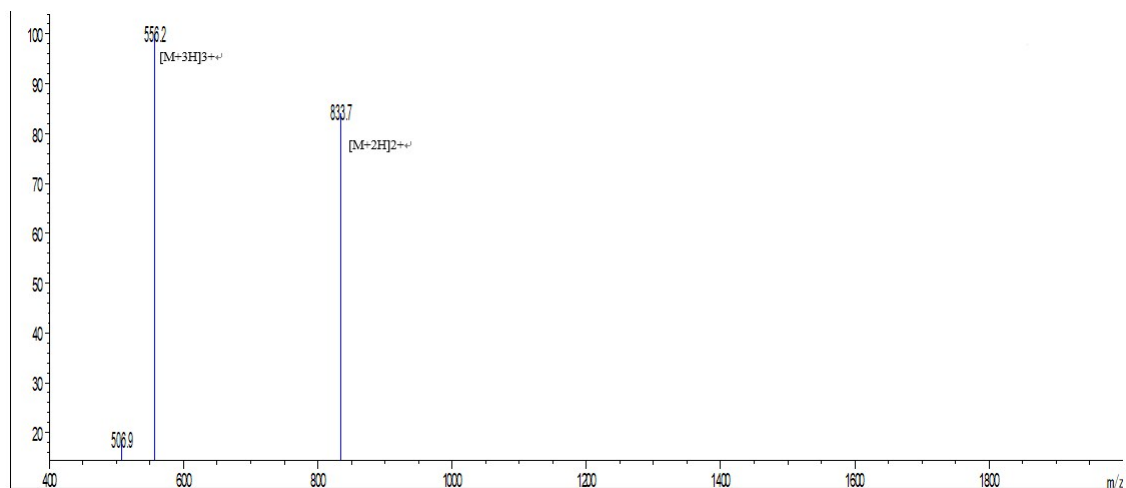

ESI-MS:  $m/z$  for  $C_{84}H_{141}N_{15}O_{17}S$   $[M+2H]^{2+}$  calcd 833.0, found 833.7;  $[M+3H]^{3+}$  calcd 555.7, found 556.2.

The compound was characterized in previous report<sup>2</sup>.

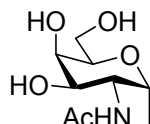

QYIKANSKFIGITEGHGVTSAPDTRPAPGSTAPPA

**5**

### Compound 5

H-Gln-Tyr-Ile-Lys-Ala-Asn-Ser-Lys-Phe-Ile-Gly-Ile-Thr-Glu-Gly-His-Gly-Val-Thr-Ser-Ala-Pro-Asp-Thr( $\alpha$ -GalNAc)-Arg-Pro-Ala-Pro-Gly-Ser-Thr-Ala-Pro-Pro-Ala-OH.

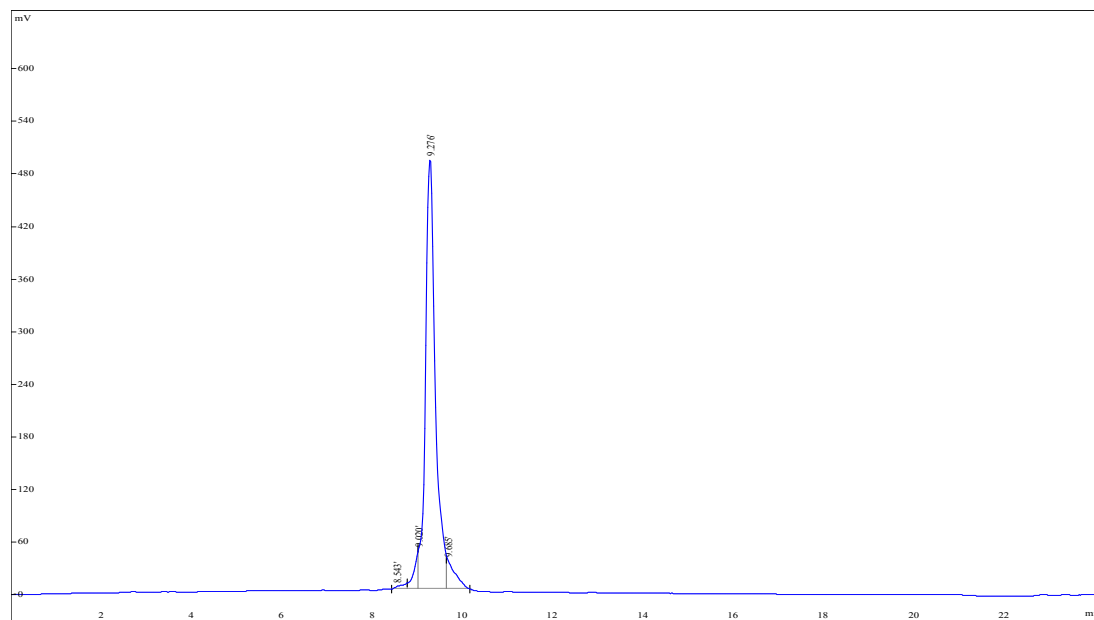

Analytical HPLC:  $R_t$  (retention time) = 9.3 min (16-40% of acetonitrile and 0.1% trifluoroacetic acid over 30 min on a C-18 column,  $\lambda=220$  nm). Yield 38% (10.1 mg).



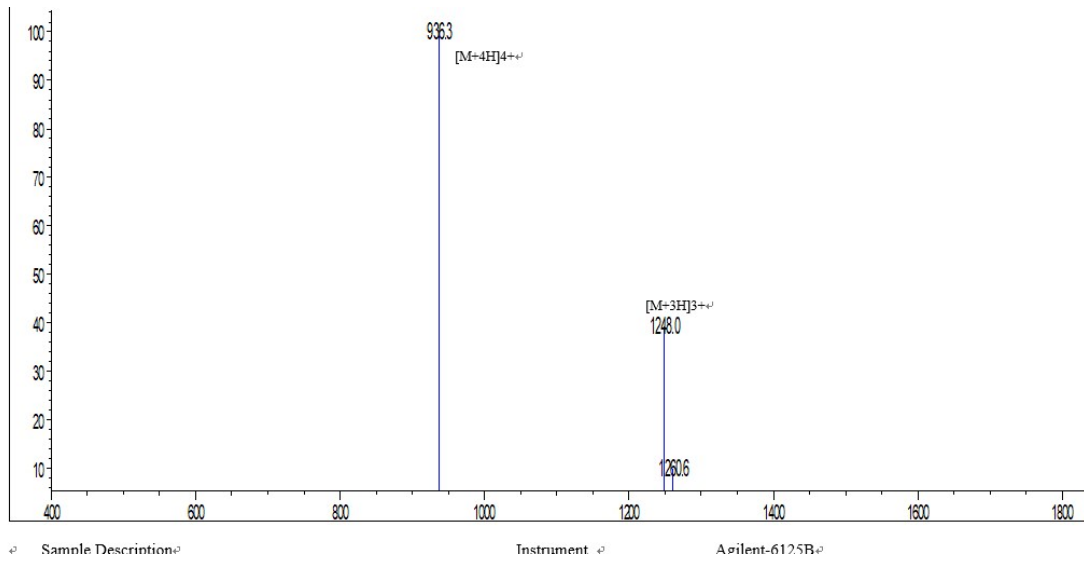

ESI-MS: m/z for  $C_{164}H_{259}N_{45}O_{55}$  [M+3H]<sup>3+</sup> calcd 1247.3, found 1248.0; [M+4H]<sup>4+</sup> calcd 935.7, found 936.3.

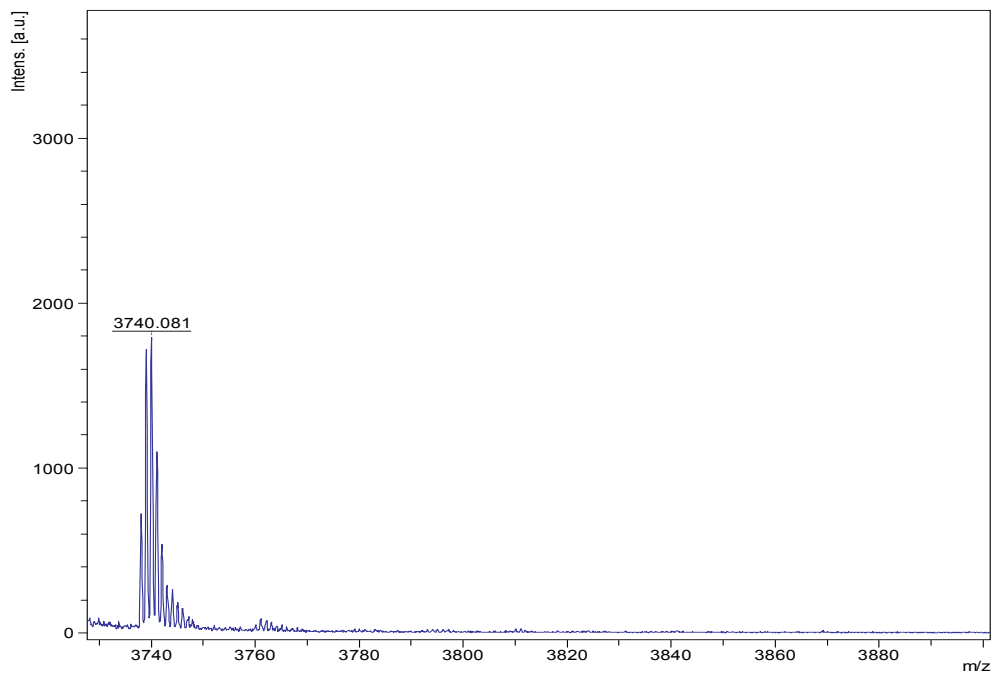

MALDI-TOF-MS :  $C_{164}H_{259}N_{45}O_{55}$  [M+H]<sup>+</sup> calcd 3739.8926, found 3740.081

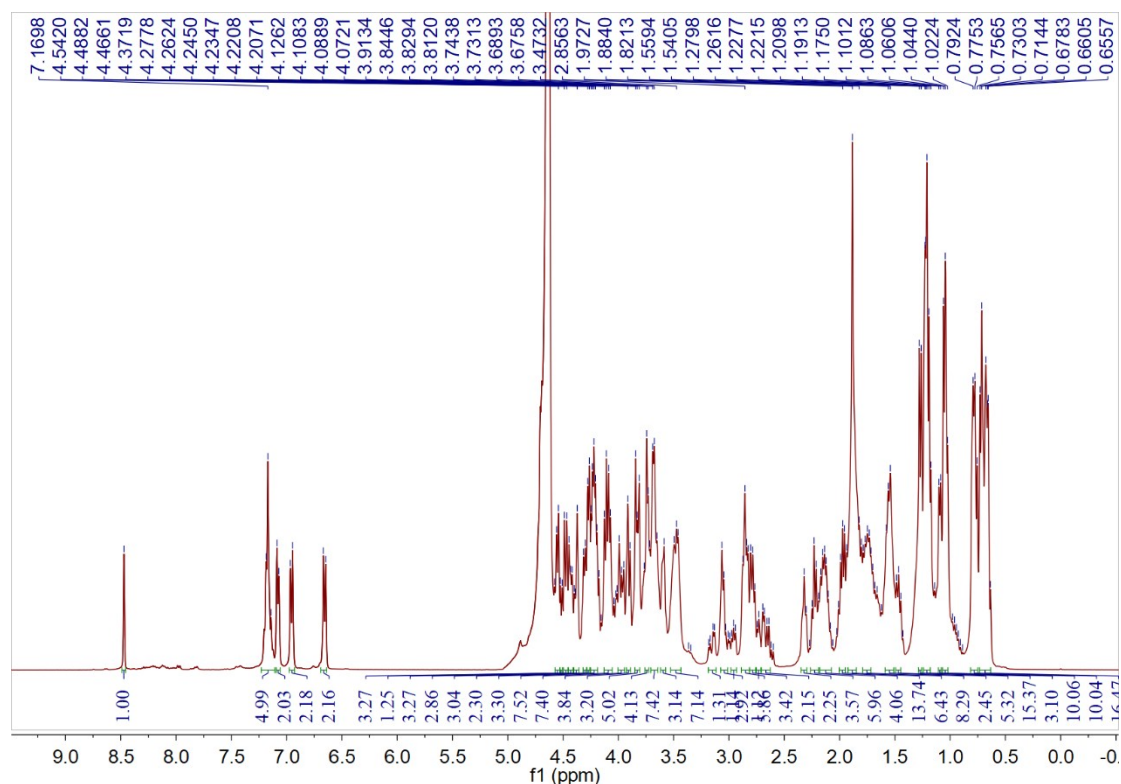

<sup>1</sup>H NMR (400 MHz, D<sub>2</sub>O) δ 8.47 (s, 1H), 7.23 – 7.11 (m, 5H), 7.08 (d, *J* = 6.9 Hz, 2H), 6.96 (d, *J* = 8.0 Hz, 2H), 6.66 (d, *J* = 8.2 Hz, 2H), 4.57 – 4.53 (m, 3H), 4.52 (d, *J* = 6.9 Hz, 2H), 4.48 (d, *J* = 8.8 Hz, 2H), 4.45 – 4.41 (m, 4H), 4.40 – 4.36 (m, 3H), 4.32 – 4.29 (m, 2H), 4.27 (s, 3H), 4.25 – 4.19 (m, 8H), 4.16 – 4.08 (m, 7H), 4.00 – 3.94 (m, 4H), 3.92 – 3.86 (m, 3H), 3.85 – 3.81 (m, 5H), 3.74 (d, *J* = 5.0 Hz, 4H), 3.71 – 3.64 (m, 7H), 3.59 (s, 3H), 3.53 – 3.43 (m, 8H), 3.16 (s, 1H), 3.08 – 3.02 (m, 3H), 2.98 – 2.93 (m, 1H), 2.89 – 2.81 (m, 6H), 2.81 – 2.76 (m, 3H), 2.74 (d, *J* = 6.3 Hz, 1H), 2.67 (dd, *J* = 15.6, 6.5 Hz, 2H), 2.31 (d, *J* = 7.0 Hz, 2H), 2.26 – 2.20 (m, 4H), 2.18 – 2.07 (m, 6H), 2.00 – 1.95 (m, 4H), 1.92 – 1.84 (m, 14H), 1.79 – 1.72 (m, 6H), 1.59 – 1.51 (m, 8H), 1.49 – 1.45 (m, 2H), 1.31 – 1.24 (m, 5H), 1.24 – 1.18 (m, 15H), 1.11 – 1.07 (m, 3H), 1.07 – 1.02 (m, 10H), 0.82 – 0.75 (m, 10H), 0.72 – 0.66 (m, 16H).

Selected signals δ 8.47 (1H, Arg); 7.23 – 6.66 (11 H, Tyr, Phe, His-aryl group).

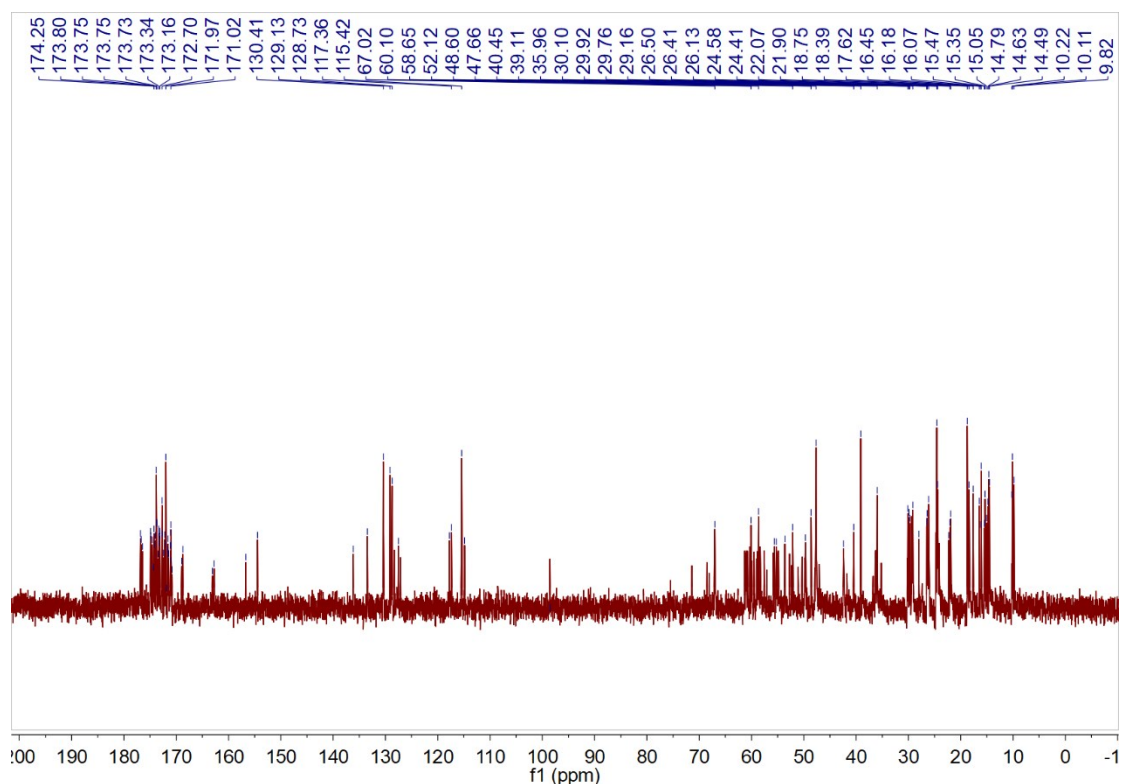

$^{13}\text{C}$  NMR (101 MHz,  $\text{D}_2\text{O}$ , selected signals for carbonyl groups, Arg, Tyr and C-1)  $\delta$ 176.84, 176.69, 176.46, 174.90, 174.88, 174.58, 174.29, 174.25, 174.19, 174.02, 173.80, 173.75, 173.75, 173.73, 173.51, 173.34, 173.32, 173.27, 173.18, 173.16, 172.70, 172.64, 172.42, 172.20, 172.07, 171.97, 171.87, 171.64, 171.57, 171.52, 171.52, 171.46, 171.13, 171.09, 171.02, 171.00, 170.92, 170.80, 168.94, 168.72, 163.10, 162.74, 156.70 (Arg), 154.46 (Tyr), 98.48 (C-1).

#### Antigen for ELISA plate coating

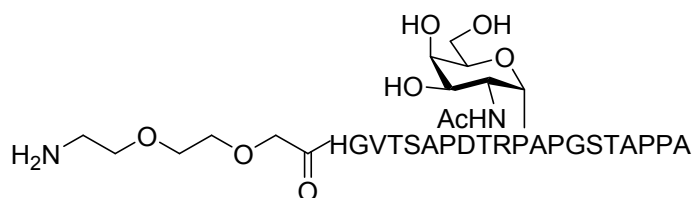

$\text{NH}_2(\text{CH}_2\text{CH}_2\text{O})_2\text{CH}_2\text{CO}$ -His-Gly-Val-Thr-Ser-Ala-Pro-Asp-Thr( $\alpha$ -D-GalNAc)-Arg-Pro-Ala-Pro-Gly-Ser-Thr-Ala-Pro-Pro-Ala-OH

The compound was characterized in our previous report<sup>1</sup>.

## FACS analysis of the antisera binding with B16-MUC1 cells

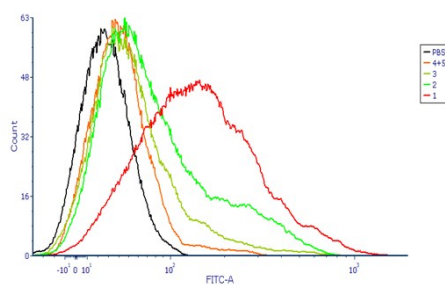

**Fig. S1** FACS analysis of the antisera binding with B16-MUC1 cells. The sera from mice injected with PBS was used as control (black)

## References

1. Y. Liu, W. Zhang, Q. He, F. Yu, T. Song, T. Liu, Z. Zhang, J. Zhou, P. G. Wang and W. Zhao, *Chem. Commun.*, 2016, **52**, 10886-10889.
2. L. Israel, Y. Wang, K. Bulek, E. Della Mina, Z. Zhang, V. Pedernana, M. Chrabieh, N. A. Lemmens, V. Sancho-Shimizu, M. Descatoire, T. Lasseau, E. Israelsson, L. Lorenzo, L. Yun, A. Belkadi, A. Moran, L. E. Weisman, F. Vandenesch, F. Batteux, S. Weller, M. Levin, J. Herberg, A. Abhyankar, C. Prando, Y. Itan, W. J. B. van Wamel, C. Picard, L. Abel, D. Chaussabel, X. Li, B. Beutler, P. D. Arkwright, J. L. Casanova and A. Puel, *Cell*, 2017, **168**, 789-800.
